# Supplementary material for: Overexpression of the QKI Gene Promotes Differentiation of Goat Myoblasts into Myotubes
Source: MDPI journal article supplement (doi:10.3390/ani13040725), 2023-02-17
Supplement: s1 [file s1]

## Supplementary Tables

Table S1. Statistical table of sequencing data

| Sample | Raw Reads  | Raw Bases | Clean Reads | Clean Bases | GC(%) | Q20(%) | Q30(%) |
|--------|------------|-----------|-------------|-------------|-------|--------|--------|
| OE1    | 40,444,350 | 6.07G     | 3,941,7024  | 5.91G       | 51.32 | 97.21  | 92.51  |
| OE3    | 44,674,980 | 6.70G     | 4,358,1784  | 6.54G       | 51.84 | 97.22  | 92.55  |
| OE2    | 47,489,000 | 7.12G     | 4,601,4404  | 6.90G       | 52.33 | 97.22  | 92.59  |
| NC1    | 40,315,362 | 6.05G     | 3,921,9804  | 5.88G       | 52.22 | 97.31  | 92.77  |
| NC2    | 42,533,996 | 6.38G     | 4,147,4496  | 6.22G       | 52.21 | 97.09  | 92.29  |
| NC3    | 40,397,998 | 6.06G     | 3,877,9502  | 5.82G       | 52.24 | 97.29  | 92.77  |

Table S2. Comparisons of transcriptome sequencing data and the reference genome

| Sample | Raw Reads  | Total Map  | Unique Map | Multiple Map | Positive Map | Negative Map |
|--------|------------|------------|------------|--------------|--------------|--------------|
| OE1    | 39,417,024 | 37,915,486 | 36,298,110 | 1,617,376    | 18,120,738   | 18,177,372   |
|        |            | (96.19%)   | (92.09%)   | (4.1%)       | (45.97%)     | (46.12%)     |
| OE3    | 43,581,784 | 42,031,265 | 40,367,617 | 1,663,648    | 20,150,285   | 20,217,332   |
|        |            | (96.44%)   | (92.62%)   | (3.82%)      | (46.24%)     | (46.39%)     |
| OE2    | 46,014,404 | 44,364,547 | 42,527,659 | 1,836,888    | 21,226,552   | 21,301,107   |
|        |            | (96.41%)   | (92.42%)   | (3.99%)      | (46.13%)     | (46.29%)     |
| NC1    | 39,219,804 | 37,885,909 | 36,392,892 | 1,493,017    | 18,163,351   | 18,229,541   |
|        |            | (96.6%)    | (92.79%)   | (3.81%)      | (46.31%)     | (46.48%)     |
| NC2    | 41,474,496 | 39,942,322 | 38,361,063 | 1,581,259    | 19,144,785   | 19,216,278   |
|        |            | (96.31%)   | (92.49%)   | (3.81%)      | (46.16%)     | (46.33%)     |
| NC3    | 38,779,502 | 37,372,195 | 35,901,018 | 1,471,177    | 17,914,964   | 17,986,054   |
|        |            | (96.37%)   | (92.58%)   | (3.79%)      | (46.2%)      | (46.38%)     |

Table S3. GO terms related to goat skeletal muscle development

| Sample     | Description                        | Up_Gene | Down_Gene |
|------------|------------------------------------|---------|-----------|
| GO:0061061 | muscle structure development       | 3       | 17        |
| GO:0030016 | myofibril                          | 0       | 17        |
| GO:0043292 | contractile fiber                  | 0       | 17        |
| GO:0007517 | muscle organ development           | 2       | 14        |
| GO:0060537 | muscle tissue development          | 2       | 14        |
| GO:0006936 | muscle contraction                 | 0       | 12        |
| GO:0042692 | muscle cell differentiation        | 2       | 8         |
| GO:0007519 | skeletal muscle tissue development | 2       | 6         |
| GO:0055001 | muscle cell development            | 1       | 7         |
| GO:0014902 | myotube differentiation            | 2       | 4         |
| GO:0030239 | myofibril assembly                 | 0       | 5         |
